# Supplementary material for: Development of Crystalline Cu2S Nanowires via a Direct Synthesis Process and Its Potential Applications
Source: MDPI journal article supplement (doi:10.3390/nano10020399), 2020-02-24
Supplement: s1 [file s1]

## Supplementary file

# Development of Crystalline Cu<sub>2</sub>S Nanowires via A Directly Synthesis Process and Its Potential Applications

Chih-Yen Chen<sup>a,\*</sup>, Jian-Ru Jiang<sup>b</sup>, Wen-Shuo Chuang<sup>a</sup>, Ming-Song Liu<sup>b</sup>, Sheng-Wei Lee<sup>b,\*</sup>

<sup>a</sup> Department of Materials and Optoelectronic Science, National Sun Yat-Sen University, Kaohsiung 804, Taiwan, ROC

<sup>b</sup> Institute of Materials Science and Engineering, National Central University, Taoyuan 320, Taiwan, ROC

\* Correspondence: [cychen@mail.nsysu.edu.tw](mailto:cychen@mail.nsysu.edu.tw); [swlee@g.ncu.edu.tw](mailto:swlee@g.ncu.edu.tw)

The SEM images in Figure S1 reveals the volume of 4 ml, 7ml, and 10 ml ethylenediamine which were added respectively into the reaction solutions with 10 g sodium hydroxide at 70 °C for 10 h. Figure S1 show a certain amount of ethylenediamine was indispensable to control the morphology and density of nanowires as shown in Figure S1 (see supplementary file).

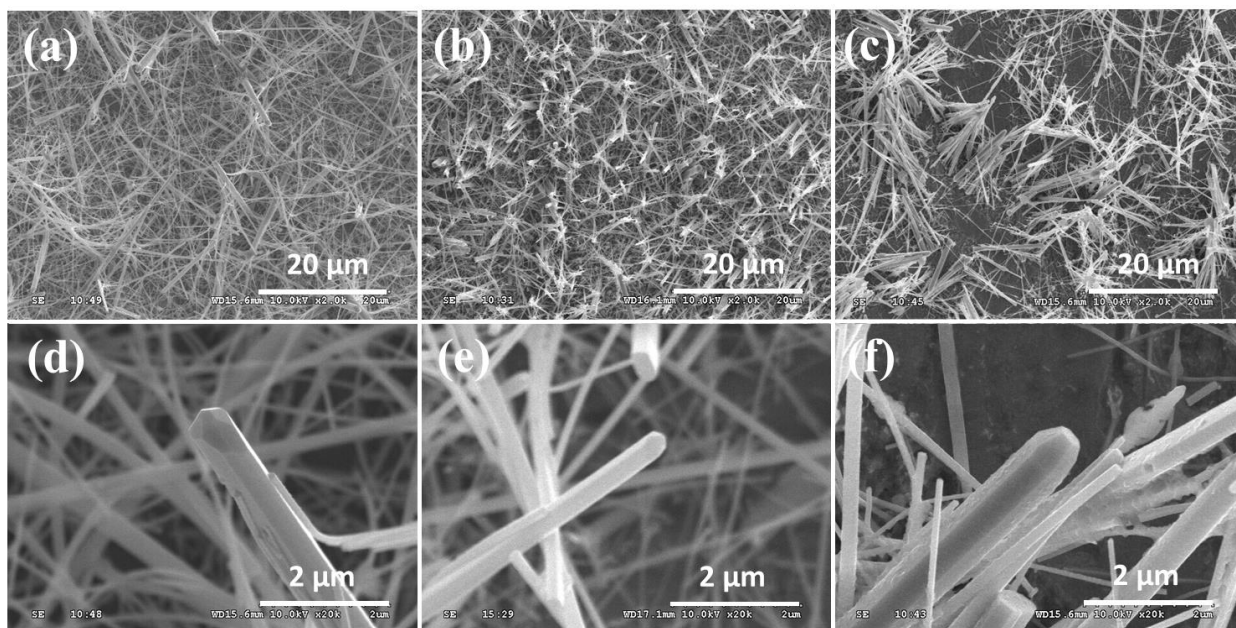

Figure S1. SEM images of as-prepared free standing Cu<sub>2</sub>S nanowire grown under different reaction conditions. The three conditions are added (a) 4 ml, (b) 7 ml, (c) 10 ml ethylenediamine with 10 g sodium hydroxide at 70 °C for 10 hours.
